# Supplementary material
Source: PubMed Central journal article supplement (PMC2660383)
Supplement: NIHMS64454-supplement-1.pdf [file NIHMS64454-supplement-1.pdf]

Supplemental table 1. Candidate genes for depressive symptoms in CAD by pathway

| <u>Genes</u>                              | <u>Short name</u> | <u>Location</u>   | <u>Genes</u>                            | <u>Short name</u> | <u>Location</u> |
|-------------------------------------------|-------------------|-------------------|-----------------------------------------|-------------------|-----------------|
| <b>Platelet activation</b>                |                   |                   | <b>Inflammation</b>                     |                   |                 |
| Tryptophan hydroxylase 2                  | TPH2              | 12q15             | Myeloperoxidase precursor               | MPO               | 17q23.1         |
| 5-HTT                                     | SLC6A4            | 17q11.1-q12       | Interleukin 6                           | IL6               | 7q21            |
| 5-HT2                                     | HTR2A             | 13q14-q21         | Interleukin1b                           | IL1B              | 2q14            |
| Thrombomodulin                            | THBD              | 20p11.2           | Intercellular adhesion molecule         | ICAM1             | 19p13.3-13.2    |
| Prothrombin                               | F2                | 11p11             | Vascular cell adhesion molecule1        | VCAM1             | 1p32-p31        |
| von Willebrand factor                     | VWF               | 12p13.3           | Monocyte chemoattractant protein 1      | SCYA2             | 17q11.2-q12     |
| Thromboxane A synthase 1                  | TBXAS1            | 7q34              | E-selectin                              | SELE              | 1q22-q25        |
| Thromboxane A2 receptor                   | TBXA2R            | 19p33.3           | P-selectin                              | SELP              | 1q22-q25        |
| Purinergic receptor P2Y1                  | P2RY1             | 3q25              | Tumor necrosis factor - alpha           | TNF               | 6p21.3          |
| Purinergic receptor P2Y12                 | P2RY12            | 17p13.3; 3q24-q25 | Plasminogen activator inhibitor-1       | SERPINE1          | 7q21.3-q22      |
| Cyclooxygenase 1                          | PTGS1             | 9q32.2-q33        | C-reactive protein                      | CRP               | 1q21-q23        |
| Cyclooxygenase 2                          | PTGS2             | 1q25.2-q          | CC chemokine receptor 2                 | CCR2              | 3p21            |
| Calcium channel, L-type                   | CACNA1C           | 12p13.31          | <b>Sympathetic function</b>             |                   |                 |
| G protein beta 3 subunit                  | GNB3              | 12p13.31          | Tyrosine hydroxylase                    | TH                | 11p15.5         |
| cAMP responsive element binding protein 1 | CREB1             | 2q33.3            | Aromatic l-aminodecarboxylase           | DDC               | 7p11            |
| Platelet glycoprotein 1b                  | GP1BA             | 17p13.2           | Dopamine beta hydroxylase               | DBH               | 9q34            |
| Platelet glycoprotein IIb                 | ITGA2B            | 17q21.1-q21.3     | Phenylethanolamine-N-methyl transferase | PNMT              | 17q21-q22       |
| Platelet glycoprotein IIIa                | ITGB3             | 17q21.32          | Adrenoreceptor - beta1                  | ADRB1             | 10q24-q26       |
| <b>Omega 3/6 metabolism</b>               |                   |                   | Adrenoreceptor - beta2                  | ADRB2             | 5q32-q34        |
| delta5 desaturase                         | FADS1             | 11q12.2           | Adrenoreceptor - alpha 1a               | ADRA1A            | 8p21            |
| delta6 desaturase                         | FADS2             | 11q12.2           | Adrenoreceptor - alpha 1b               | ADRA1B            | 5q33            |
| delta9 desaturase                         | FADS3             | 11q12.2           | Adrenoreceptor - alpha 2 a              | ADRA2A            | 10q24-q26       |
| HELO1/ELOVL5                              | ELOVL5            | 6p12.1            | Monoamine oxydase A                     | MAOA              | Xp11.23         |
| Long chain fatty acid Co-A ligase Type 4  | FACL4             | Xq23              | Monoamine oxydase B                     | MAOB              | Xp11.23         |
| <b>HPA</b>                                |                   |                   | <b>Parasympathetic function</b>         |                   |                 |
| Glucocorticoid receptor                   | NR3C1             | 5q31.3            | Choline transporter                     | SLC5A7            | 2q12            |
| 11beta-HSD1                               | HSD11B1           | 1q32.2            | Choline acetyltransferase               | CHAT              | 10q11.2         |
| 11beta-HSD2                               | HSD11B2           | 16q22.1           | Acetylcholine esterase                  | ACHE              | 7q22            |
| Angiotensin converting enzyme             | ACE               | 17q23             | Acetylcholine muscarinic 2 receptor     | CHRM2             | 7q33            |
| Vasopressin                               | AVP               | 20p13             | Neuronal nitric oxide synthase          | NOS1              | 12q24           |
| Vasopressin receptor 1b                   | AVPR1B            | 1q32              | Endothelial nitric oxide synthase       | NOS3              | 7q36            |
| <b>MISC.</b>                              |                   |                   |                                         |                   |                 |
| Cannabinoid receptor 1                    | CNR1              | 6q14-q15          |                                         |                   |                 |
